# Supplementary material for: Molecular insights into the human ABCB6 transporter
Source: Cell Discov. 2021 Jul 27;7:55. doi: 10.1038/s41421-021-00284-z (PMC8313675; doi:10.1038/s41421-021-00284-z)
Supplement: Supplementary file 1 — Supplementary information [file 41421_2021_284_MOESM1_ESM.pdf]

Supplementary Materials for

**Molecular insights into the human ABCB6 transporter**

Guangyuan Song<sup>1\*</sup>, Sensen Zhang<sup>1\*</sup>, Mengqi Tian<sup>1\*</sup>, Laixing Zhang<sup>1\*</sup>, Runyu Guo<sup>1</sup>, Wei Zhuo<sup>1</sup>, Maojun Yang<sup>1#</sup>

*<sup>1</sup>Ministry of Education Key Laboratory of Protein Science, Tsinghua-Peking Center for Life Sciences, Beijing Advanced Innovation Center for Structural Biology, School of Life Sciences, Tsinghua University, Beijing 100084, China.*

\*These authors contribute equally to this work.

#To whom correspondence should be addressed.

**This file includes:**

Supplementary Figs. S1 to S11

Supplementary Table S1

## Supplementary Figures and Figure legends

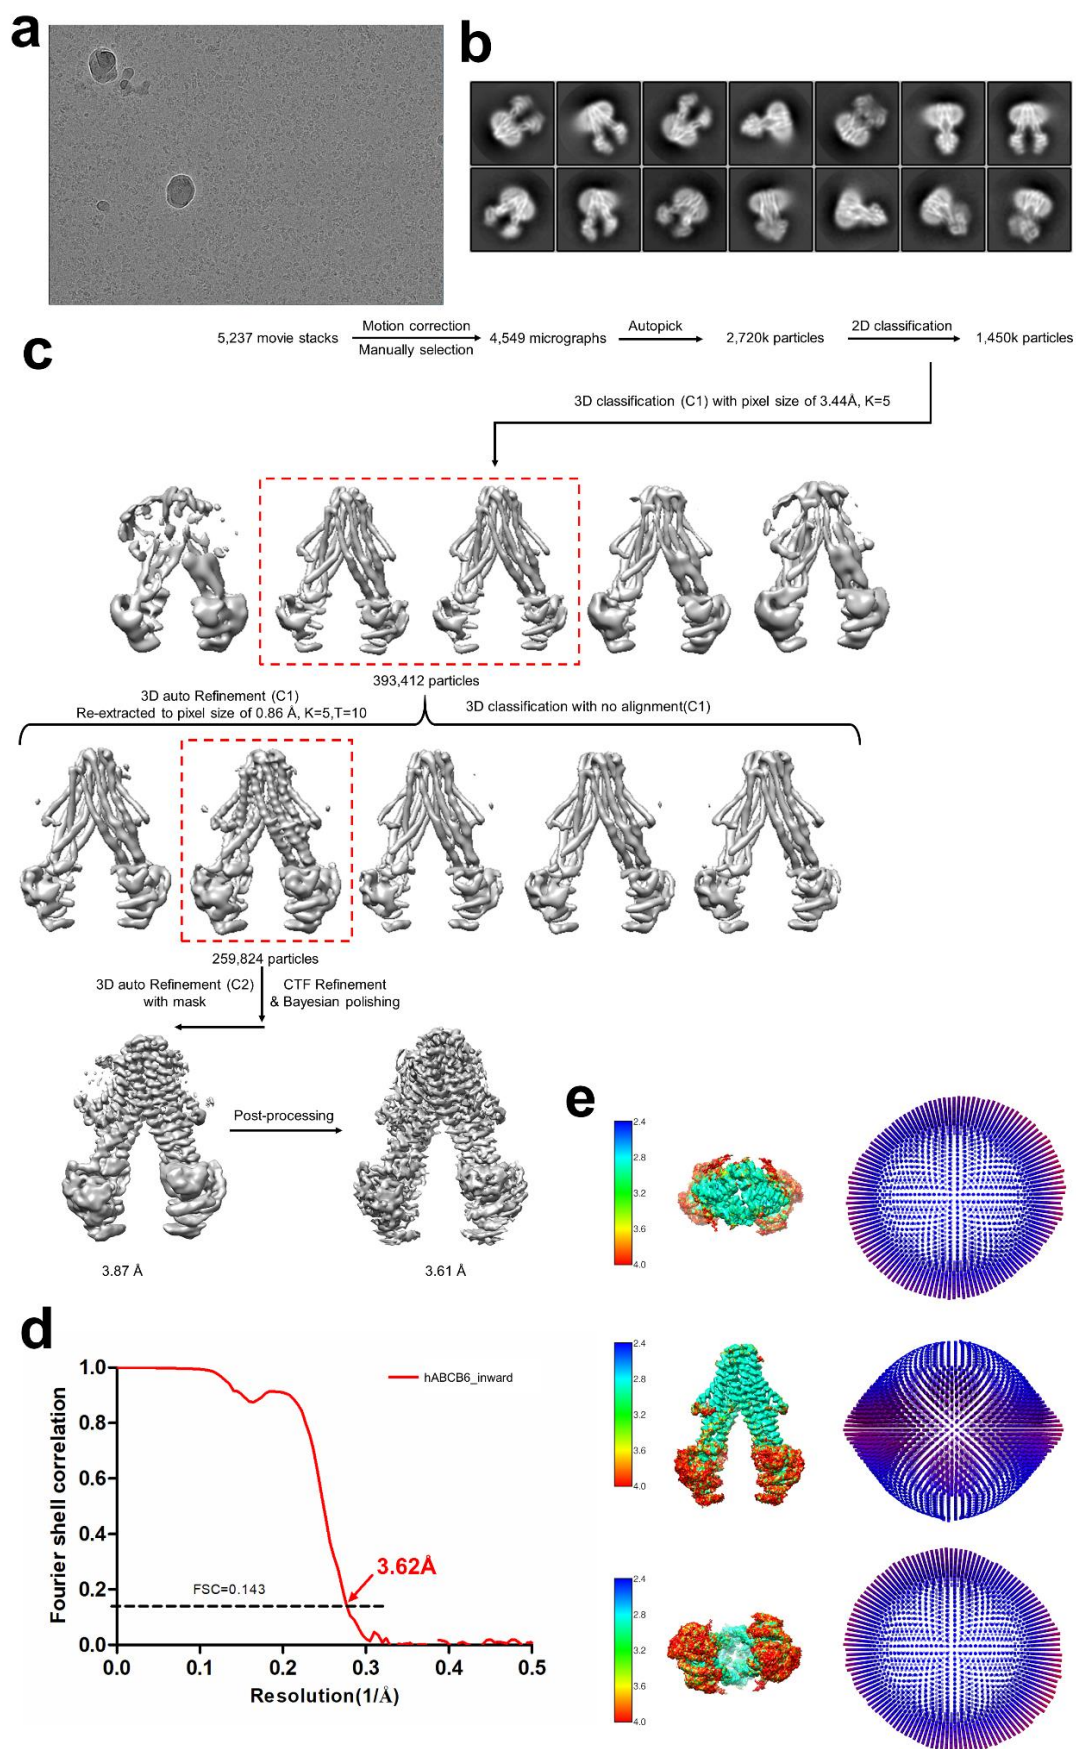

**Supplementary Fig. S1 Reconstruction and structure determination of the apo-state hABCB6.**

- a**, Representative cryo-EM micrograph of apo-state hABCB6 in nanodisc.
- b**, 2D class averages of the apo-state hABCB6 sample in nanodisc.
- c**, The workflow of 2D/3D reconstruction with apo-state hABCB6 cryo-EM data. In brief, 1,450 k particles were kept after 2D classification, and subjected to three rounds of 3D classification. A final dataset containing 260 k particles were used for high-resolution refinement (see methods for more details).
- d**, Gold-standard Fourier Shell correlation (FSC) curve of apo state hABCB6 after 3D refinement. The resolution estimation was based on the criterion of FSC 0.143 cutoff.
- e**, Angular distribution of the apo-state hABCB6 final reconstruction.

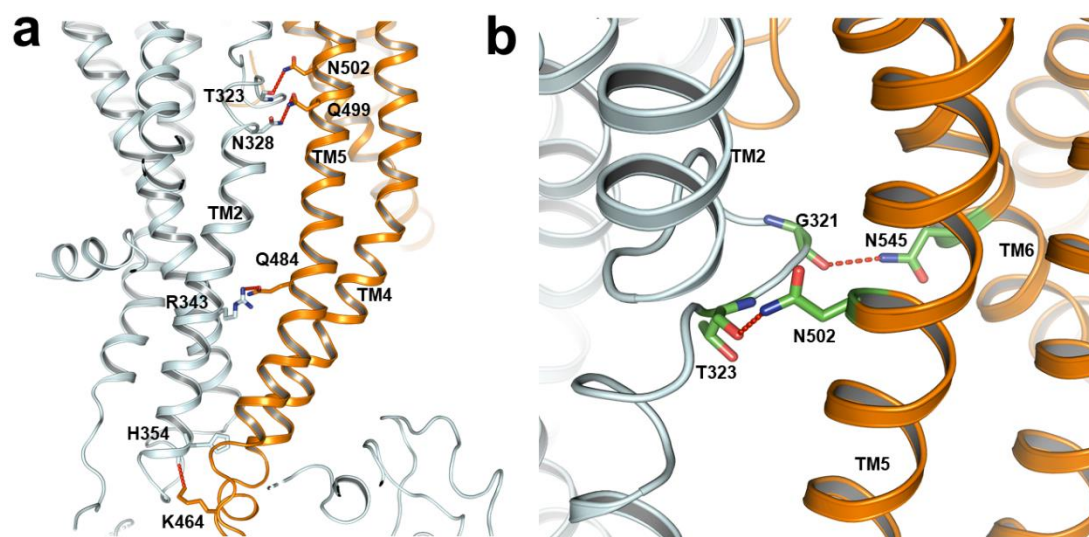

**Supplementary Fig. S2 The interactions within two hABCB6 monomers.**

**a,** The interaction between TM2 and TM5 from two neighboring monomers.

**b,** The interaction between the "plug" and TM6 from two neighboring monomers.

# Structure of hABCB6

**a**

```

1      10      20      30      40      50      60      70
ABCB6 MVTVGNYCEAEGPVGPAWMQDGLSPCFFTLLVPSTRMALGTLALV....LALPCRRR....ERPAGADSLSWGAGPRIS
ABCB7 .....MA.....LLAMHSWRWAAAAA...
ABCB1 .....
HMT1 MV..LRYNS...P.....RLN.ILELVLLYVGFFSIGSLNLLQKRKATSDPYRRKNRFRGKEPIGIIISW.WILGIAL.
ATM1 .....

80      90      100      110      120      130      140      150
ABCB6 PYVLQLLLATLQAALPLAGLAGRVGTARGAPLPSYLLLASVLESLAGACGLWLLVVERSQRARQLAMGIWIKFPH.SPGL
ABCB7 AFEKRR..HSAAILIRPLVSVSGSGP.....QWPHQLGA
ABCB1 .....
HMT1 TYVVDI.....SNLVIYALRV.....PNWMPCKTTVVCLILFLFWIIVLISCADSKALPKNADSIKAYRLSV
ATM1 .....MLLLPRCPVIGRIV.....RSKFS...GL

160      170      180      190      200
ABCB6 TLLWTVAFAAENLALVSWNSPQWWARADLG.....QVQFSLWLRYVVSGLFVTLGLWAP
ABCB7 LGTARAYQIPESLKS.....ITWQLGKG.....NSGQFLDA.....AKALQVWPL
ABCB1 .....
HMT1 LYVWAIDIVFETIFIVYSPHPNETFQGLVLADHVARLVLCVFATAIYLTYYRRKHITHDPLDFEERQLTEESN..VNENAI
ATM1 IIRNHS...PV...I.....FTVSKLS.....TORPLLF.....NSAVNLWNQ

210      220      230      240      250      260      270      280
ABCB6 GLRPQSYTL...QVHEEDQ.DVERSQVRSAAQSTWRDFGRKLRLLSGYLVWFRGSPAQLVVLITGLMLGLEALNVLV
ABCB7 IEKRTCWGHGAGGGLHT.D.....PKE.GLKDVTIRKIKAMLSYVWFKDRPDLRARVAISLGLGGAKAMNIVV
ABCB1 ...MDLEGDRNGGAKKKNFPLNNKSEKDKKEKPTVSFISM...FRYSNWLDKLYMVVGT...LAIHIGAGLPLM
HMT1 SQNPFSTVQL..GVSASTSNF.GTLKSTL.SKKPSDKSWAEYFRSFTLLPYLVWFTKDYRLQQFIFICIVLLFLGAVNILA
ATM1 AQKDITHK.KSVEQESS.AP.KV.KTQVKKTS.KAPTUSELILKDLFRYLVWFKGNNKVRIRILALGLLISAKILNVQV

290      300      310      320      330      340
ABCB6 PIFVYRNIVNLT.....T...EKAPWNSLAW.....TTSYVFL.KFLQGGGTGSGFVSNLRTFLWIRVQCFST
ABCB7 PFMEKYAVDSL.....N...QM..SGMMLNLSAPNTVATMATAVLIGYGVSRAGAAEFNEVRNAVFGKVAQNSI
ABCB1 MLVFGEMTDIFANAGNLEDLMSNITNRSNDINDTGFFMNEEDMTRY...AYYYSIGAGVLVAAAYIQVSWCLACAGRI
HMT1 PROLGVLITEKL.....TKHSEKIPSWDVIL.....FVIYRFLQGNMVGIGSLRSFLWVVSQYAY
ATM1 PFFFKQIIDS.....N...IA..WD.....DPTVALPAAGLTILCYGVARFGSVLFGEVRNAVFAKVAQNAI

350      360      370      380      390      400      410
ABCB6 RRVELLIFSHLHESLRLMHLGRRTEGLVLRIDRGTSSVTGLSYLVFNVIPTLADTIIGIIFYSMFFNANFGLNVF...
ABCB7 RRIAKNVFLHLHNLDLGFHLRQRTGALSKAIDRGTGTSFVLSALVFNLLPIMFEVMLVSGVLYYKCGAOFALVTL...
ABCB1 HKIRKQFFHAIMRQEIIGWFDVHDVGEINTRLTDVSKINEGIG.....DKIGMFFQSMATEFTGFIVGFTFR
HMT1 RAISTKALRHVNLNLSYDFHLNKRAGEVLTALTGSSSL.NTFAEQVVFQIGPVLLDLGVAMVYFFIKFDIYFTLIVL...
ATM1 RTVSLQTFQHLMKLDLGHLSRQTGLTRAMDRTGKGLSQVLTAMVFIIPISFETISVVCGLITYQFGASFAITF...

420      430      440      450      460      470      480
ABCB6 .....LCMSLYLTLTIVVTPWRT...KFRRAVNTQENATRAVDSLLNFETVRYYNASIEVEVEREATIKVQGLEW
ABCB7 .....GTLTYYTAFIVAVTWRRT...RFRIEMNKADNDAGNAIDSLNLYETVKYFNNERYEAQYDGGFLKTYETASLK
ABCB1 GWKLTLLVILAIISPVGLSAAVWAKILSSFTDKELLAYAKAGAVAEVLAARITVIAFGGQKKELEENKNLLEAKRIGIK
HMT1 .....IMTLCYCYVTYKITSWRT...EARRKMVNSWRESYAVQNDAIMNFETVKNFDAEDFENERGHAVDIYLVKQERK
ATM1 .....STMLLYSIFITIKTART...HFRDANKADNKAASVALSLINFEAVKYFNNKYLADKNGSLMNRDSQIK

490      500      510      520      530      540      550      560
ABCB6 SSSSLVLINQTNLVIGLGLAGSLLCAYFVTEQKLQVGDY....VLFGTYTIQLYMFLNWFGTYYRMIQTNFDIMEN
ABCB7 STSTLAMLNFGQSAIFSVGLTAIMVLASQGIIVAGTLTVGDL....VMVNGLLFLQLSFLNFLGTVYRETROALIDMNT
ABCB1 KAITANISIGAAFLLIYASYALAFWYGTTLVLSGEYSIGQVLTIVFSSVLIGAFSVGQASPS....IEAFANARGAAYE
HMT1 VLFSLNLFNLIVQGGIFTFSILAIACLSAYRVTFGNFTVGD...VILLTYMIQLQQLNFFGTLYRSLONSIIIDTER
ATM1 VSSSLAFNLISGQLIFTTALTAMMYMGSTGVIGNLTVGDL....VLIINQLVFLQSVRLNLFGLSVYRDLKQSLIDMET

570      580      590      600      610      620      630
ABCB6 MFDLLKEETEVDKLPAGAPDRF...QKGRITPENVHFSSWADGR...ETLQDVSTVMPGQTIAVCGPSCGCKSTLRLLLFR
ABCB7 LFTLLKVDVTQFKKVMASPLQI.TPQTATVADNVHFSWIEQQ...KVLGSGIFEPVPAKKVAIVCGSCGCKSTVRLLLFR
ABCB1 IFKLIIDNKPSSDSYSKS..GKKPDNIKGNLBERNVHFSWADGR...KVLGSGIFEPVPAKKVAIVCGSCGCKSTVRLLLFR
HMT1 LLEIFEEKPTVVEKPNAPDLKV...TQCKVHSHVSTAYDPRK...PVLSDFINFAVQPKVIAIVCGSCGCKSTMRLILLR
ATM1 LFKLRKNEVKIKNAER...PLMLPENVPYDITPENVTGSHPR...KILKNASETIPAGKWTAVCGSCGCKSTLKLVLFR

640      650      660      670      680      690      700      710
ABCB6 FYDLSSCCIRTDGQDITISQVTOASLWSHTGVVBODTVLFNDTADNIRYGRVITAGNDEVEAAQAAGTHDATMAFPEGYRT
ABCB7 FYEFPKCSIYLAGQNIQDVSLSLRRRAVGVVBOQDAVLFHNTTYYNLLYGNISASPBVEYAVAKLAGLHDATLRMPHGYDT
ABCB1 LYDFTGCMVSVGDQDITINVRFLREIIGVVSQEPVLFATTAENIRYGRVITAGNDEVEAAQAAGTHDATLRMPHGYDT
HMT1 FFDVNSGSIITLDDQDIRNVTLSSSLRSGVVSQDSTLFPNDTLYNIRYGRVITAGNDEVEAAQAAGTHDATLRMPHGYDT
ATM1 FYDPEESCIITLNGRDIKEYDIDA LRKVIGVVSQDSTLFPNDTLYNIRYGRVITAGNDEVEAAQAAGTHDATLRMPHGYDT

```

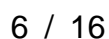

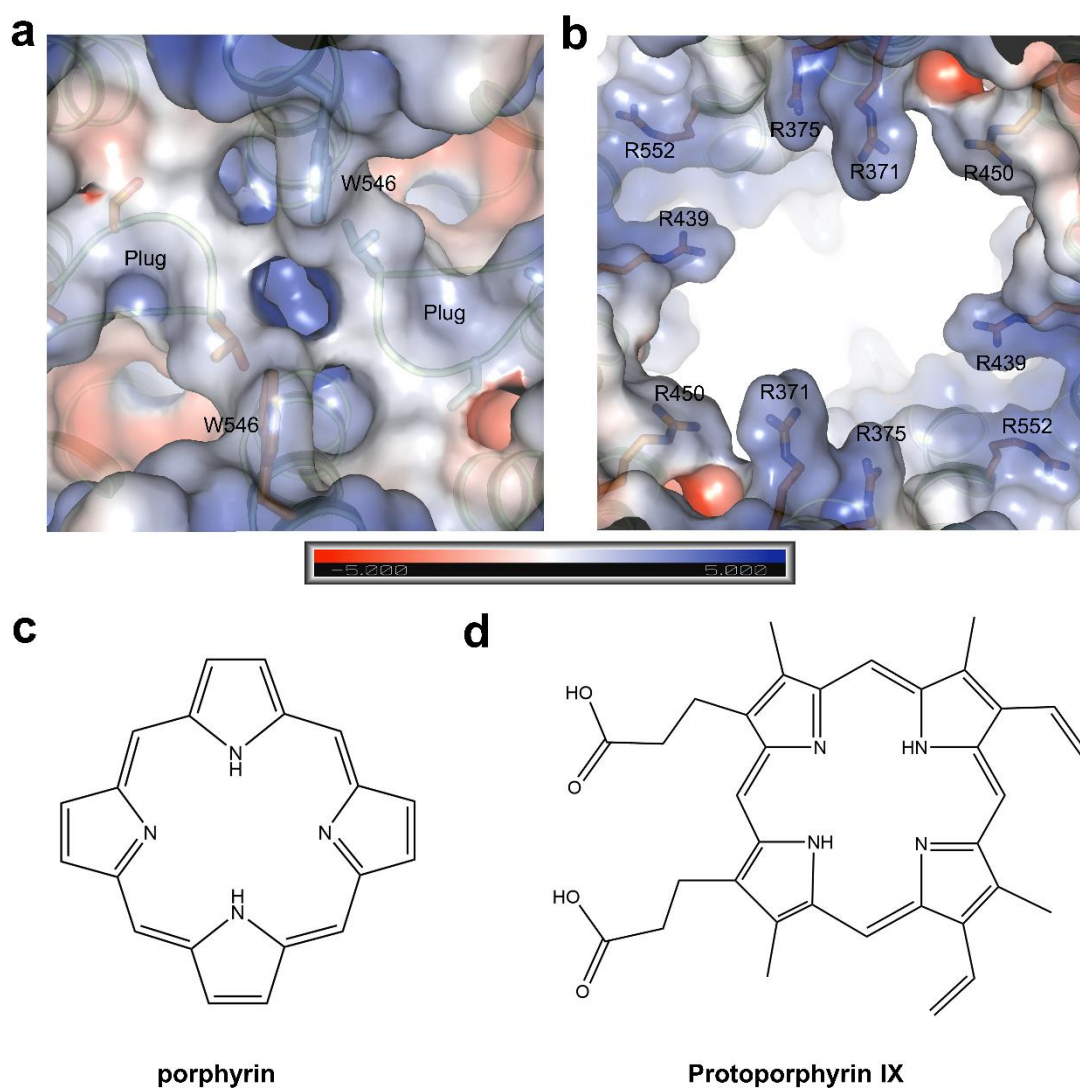

**Supplementary Fig. S4 The H-P pocket of hABCB6.**

- a,b,** The electrostatic properties of the interior surface of the translocation pathway. hydrophobic region (a) and positive region (b) were shown separately. Scale: red, negative (-5 kT/e); blue, positive (+5 kT/e). Two “plugs” and W546 are shown in (a). Side chains of representative arginine are shown in (b).
- c,** The structure of porphyrin.
- d,** The structure of protoporphyrin IX.

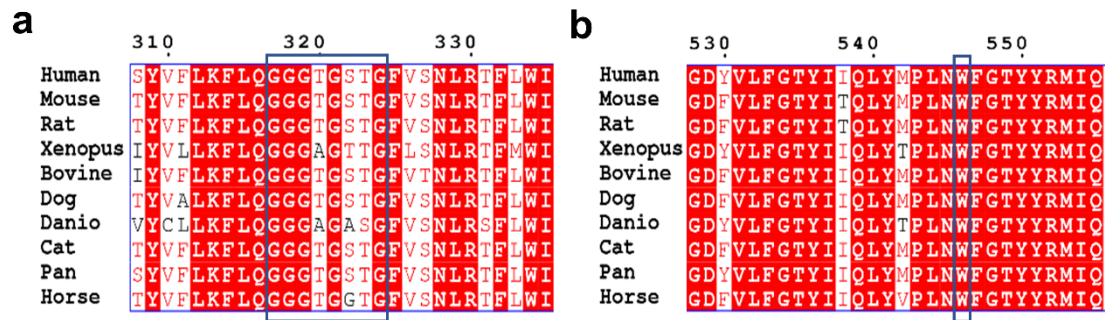

**Supplementary Fig. S5 Sequence alignment of the “plug” and W546.**

**a**, Sequence alignment of the “plug” in ABCB6 among different species.

**b**, Sequence alignment of W546 in ABCB6 among different species.

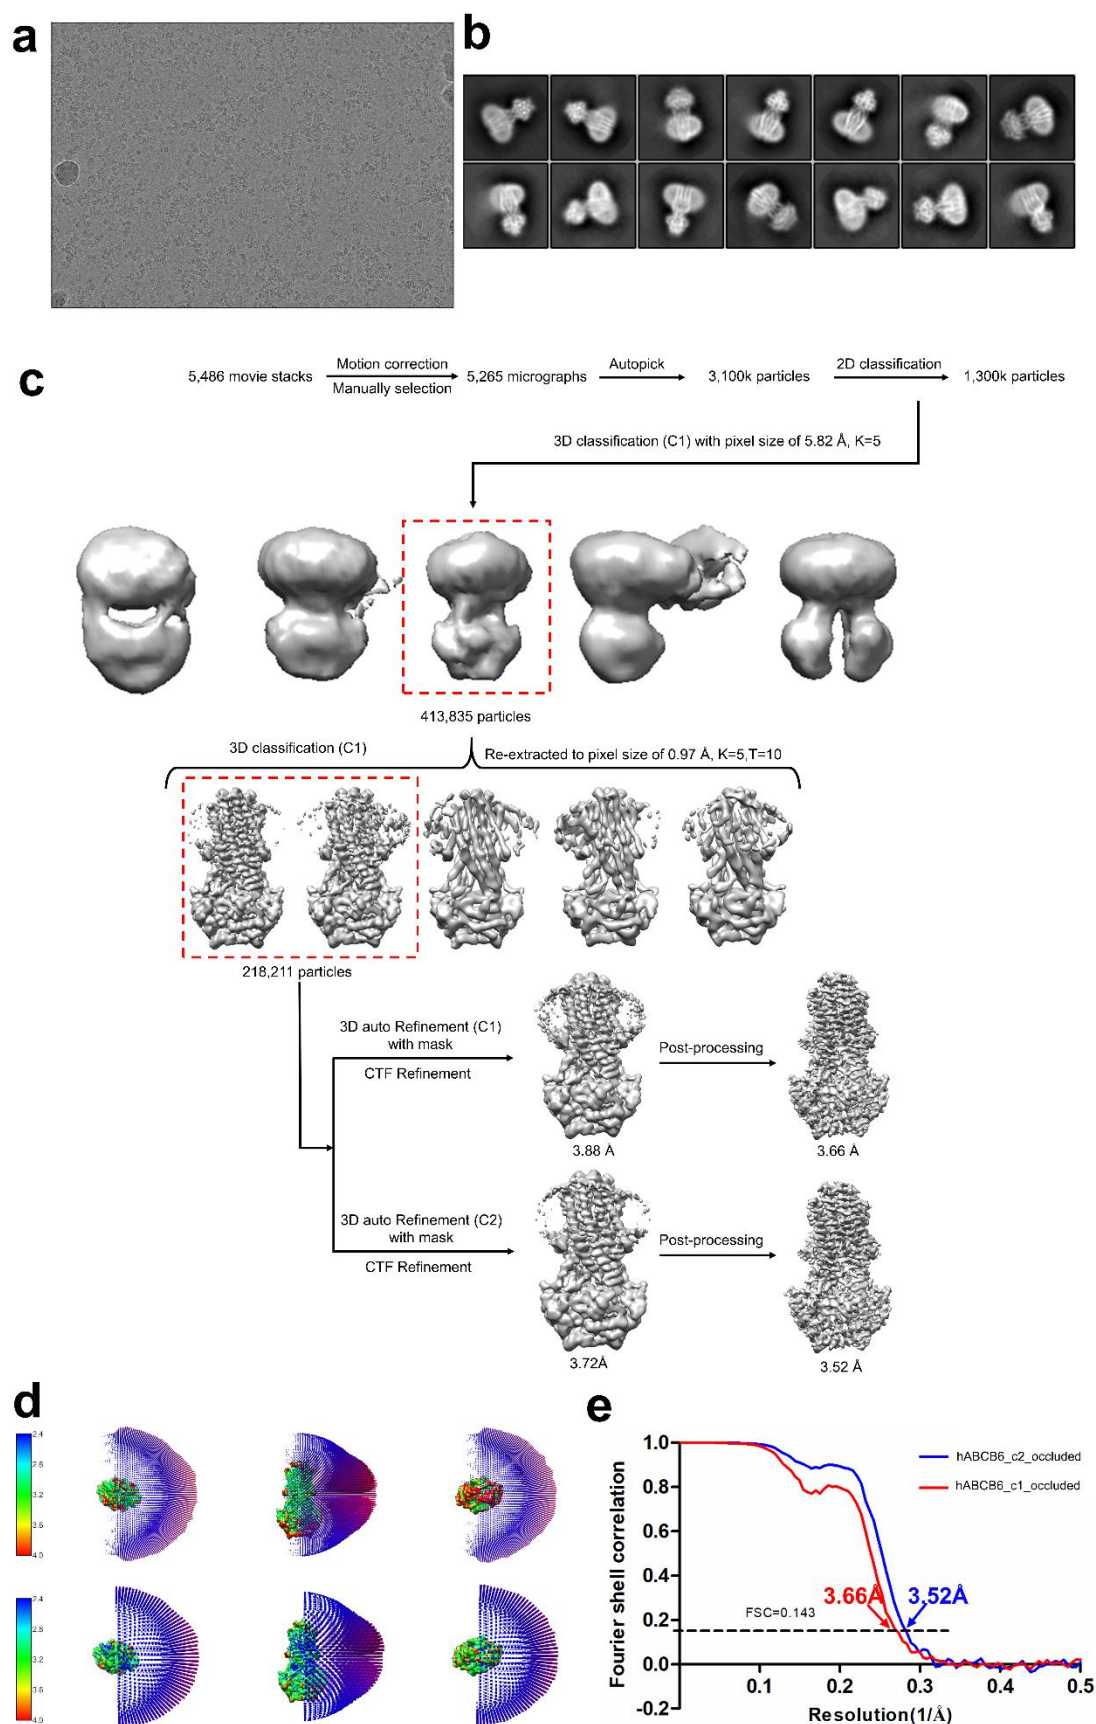

**Supplementary Fig. S6 Reconstruction and structure determination of the nucleotide-bound hABCB6.**

- a**, Representative cryo-EM micrograph of nucleotide-bound state hABCB6 in nanodisc.
- b**, 2D class averages of the nucleotide-bound state hABCB6 sample in nanodisc.
- c**, The workflow of 2D/3D reconstruction with nucleotide-bound state hABCB6 cryo-EM data. In brief, 1,300 k particles were kept after 2D classification, and subjected to three rounds of 3D classification. A final dataset containing 218 k particles were used for high-resolution refinement (see methods for more details).
- d**, Angular distribution of the nucleotide-bound state hABCB6 final reconstruction.
- e**, Gold-standard Fourier Shell correlation (FSC) curve of nucleotide-bound state hABCB6 after 3D refinement. The resolution estimation was based on the criterion of FSC 0.143 cutoff.

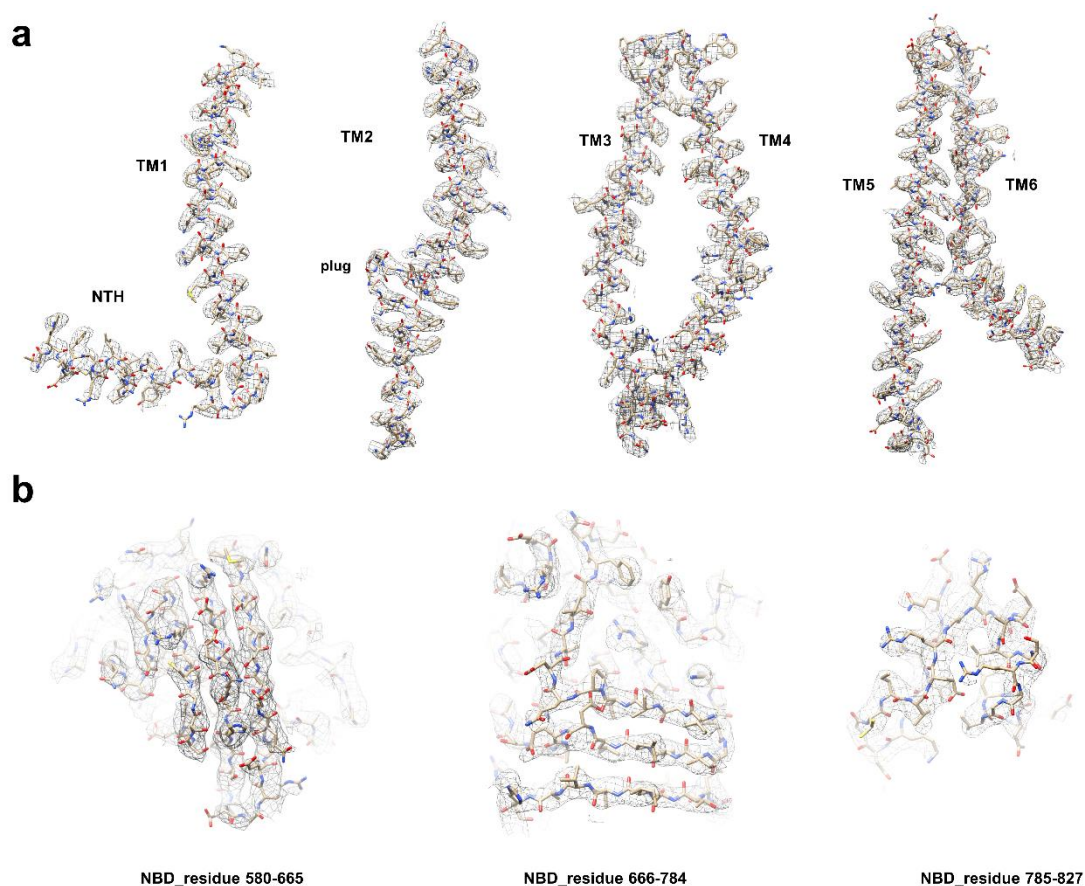

**Supplementary Fig. S7 Representative cryo-EM densities of hABCB6.**

**a**, Density maps of representative transmembrane regions of nucleotide-bound hABCB6. Stick style atomic models (gold) were fitted into the cryo-EM density maps (gray mesh). The density maps were contoured at  $10.0 \sigma$ .

**b**, Density maps of the representative nucleotide-binding region of nucleotide-bound hABCB6, similar to the panel (a).

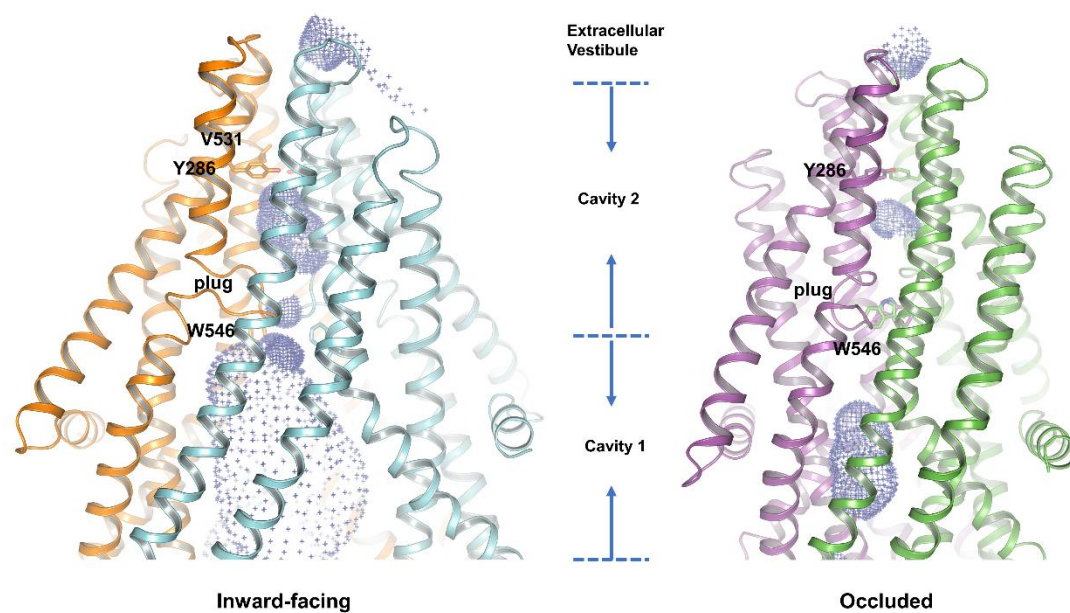

**Supplementary Fig. S8 The translocation pathway in hABCB6.**

The substrate translocation pathway of hABCB6 in two conformations calculated by HOLE software. The pockets are shown as meshed surface and two cavities are divided by the plug or W546 in different conformations.

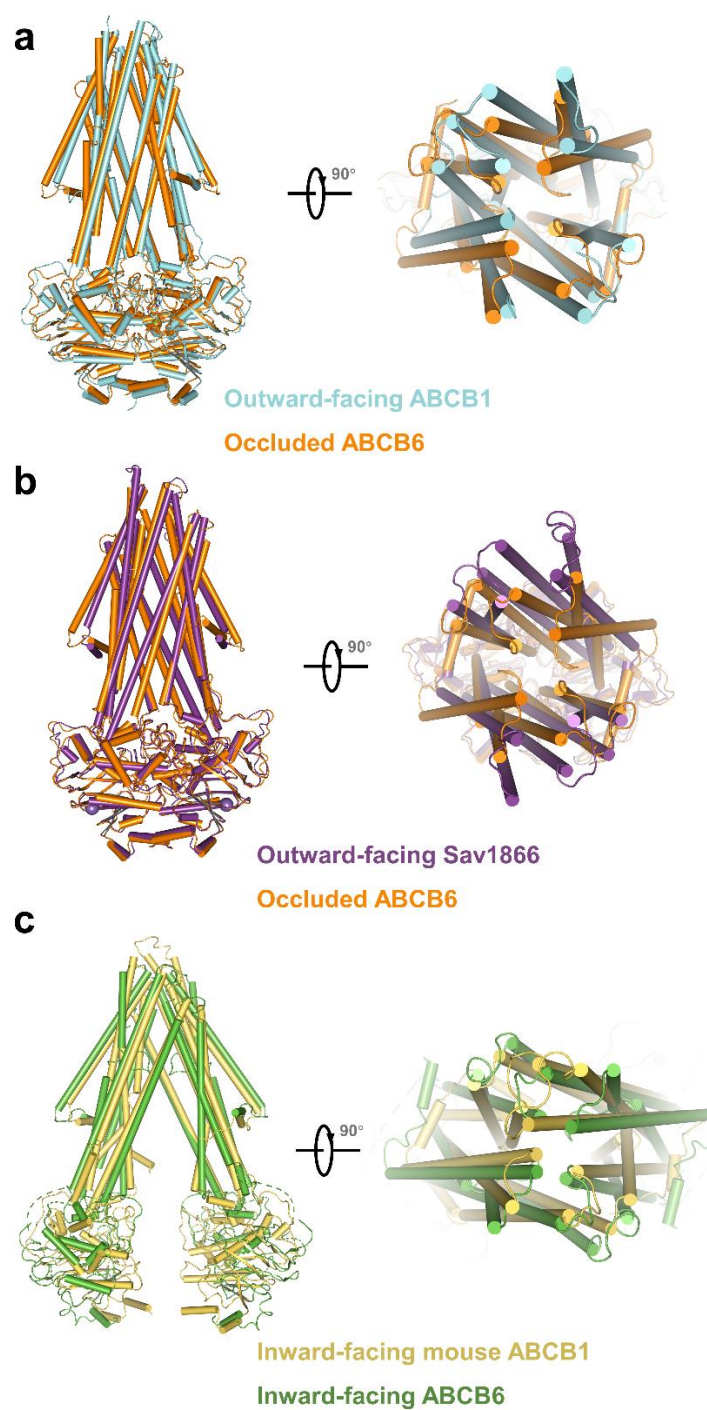

**Supplementary Fig. S9 Comparisons of hABCB6 with other homologous proteins.**

- a**, Comparison of occluded hABCB6 with outward-facing ABCB1 (6C0V).
- b**, Comparison of occluded hABCB6 with outward-facing Sav1866 (2HYD).
- c**, Comparison of inward-facing conformation hABCB6 with mouse ABCB1 (4M1M).

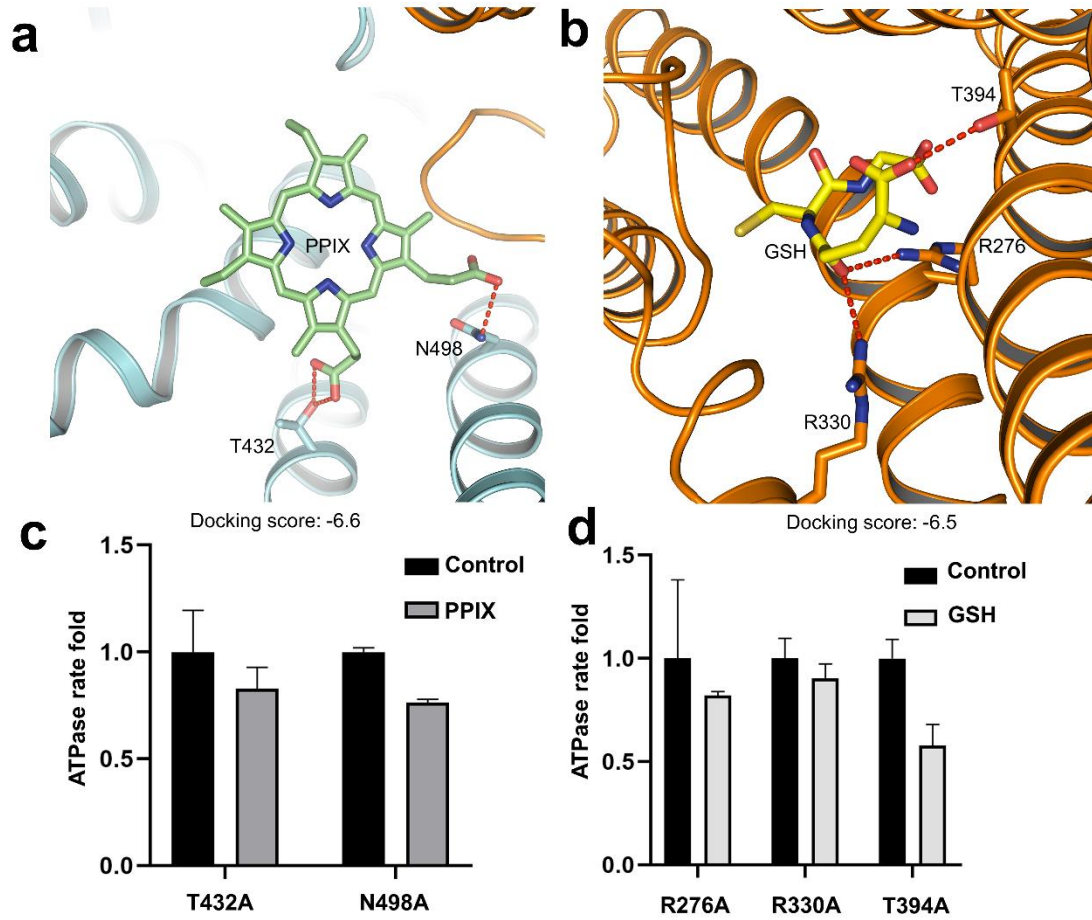

**Supplementary Fig. S10 Molecular docking of PPIX and GSH in hABCB6**

**a**, The hABCB6-PPIX dock model and the interactions between PPIX and hABCB6.

**b**, The hABCB6-GSH dock model and the interactions between GSH and hABCB6.

**c**, The ATPase rate assay of PPIX-related mutants: T432A and N498A.

**d**, The ATPase rate assay of GSH-related mutants: R276A, R330A, and T394A.

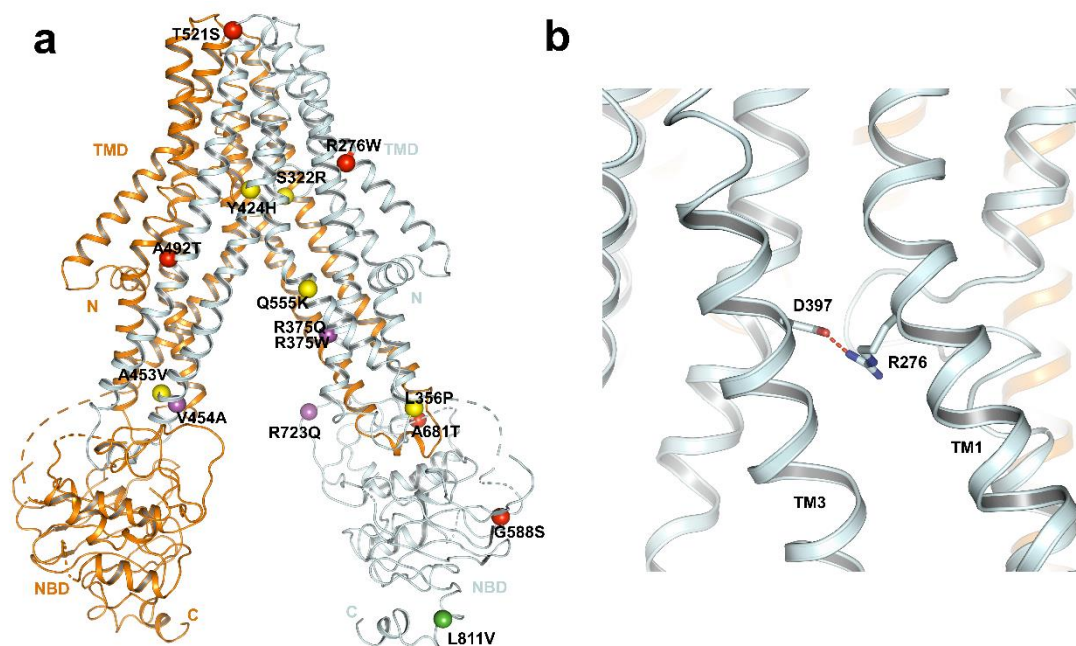

**Supplementary Fig. S11 Structural interpretation of the pathogenic mutations.**

**a,** The pathogenic mutations of hABCB6. Mutations related to different diseases are marked with different colors. Red: Porphyria. Yellow: dyschromatosis universalis hereditaria (DUH). Magenta: familial pseudohyperkalemia (FP). Green: ocular coloboma.

**b,** The interaction between R276 and D397.

**Supplementary Table S1 | Cryo-EM data collection, refinement and validation statistics**

|                                                     | ABCB6       | ABCB6[EQ]   |
|-----------------------------------------------------|-------------|-------------|
| <b>Data collection and processing</b>               |             |             |
| Magnification                                       | 130,000     | 81,000      |
| Voltage (kV)                                        | 300         | 300         |
| Electron exposure (e <sup>-</sup> /Å <sup>2</sup> ) | 50          | 50          |
| Defocus range (μm)                                  | -1.5 ~ -2.5 | -1.5 ~ -2.5 |
| Pixel size (Å)                                      | 0.86        | 0.97        |
| Software                                            | RELION-3    | RELION-3    |
| Symmetry imposed                                    | C2          | C2          |
| Initial particle images (no.)                       | 1450,000    | 1300,000    |
| Final particles images (no.)                        | 259,000     | 218,000     |
| Map resolution (Å)                                  | 3.62        | 3.52        |
| FSC threshold                                       | 0.143       | 0.143       |
| Local map resolution range (Å)                      | 2.4-4.0     | 2.4-4.0     |
| <b>Refinement</b>                                   |             |             |
| Software                                            | PHENIX 1.14 | PHENIX 1.14 |
| Initial model used (PDB code)                       |             |             |
| Model resolution (Å)                                | 3.7         | 3.6         |
| FSC threshold                                       | 0.5         | 0.5         |
| Map sharpening <i>B</i> factor                      | -162.9      | -198.7      |
| Model composition                                   |             |             |
| Non-hydrogen atoms                                  | 8828        | 9394        |
| Protein residues                                    | 782         | 1184        |
| Ligand                                              | 0           | 0           |
| B factors (Å <sup>2</sup> )                         |             |             |
| Protein                                             | 55.36       | 45.08       |
| Ligand                                              | 0           | 0           |
| R.m.s deviations                                    |             |             |
| Bond length (Å)                                     | 0.005       | 0.004       |
| Bond angles (°)                                     | 1.199       | 0.839       |
| Validation                                          |             |             |
| MolProbity score                                    | 2.55        | 1.52        |
| Clashscore                                          | 5.69        | 4.66        |
| Poor rotamers (%)                                   | 7.73        | 0.40        |
| Ramachandran plot                                   |             |             |
| Favored (%)                                         | 89.28       | 95.92       |
| Allowed (%)                                         | 9.56        | 4.08        |
| Disallowed (%)                                      | 0.18        | 0.00        |
